# Supplementary material for: Perceptions of e-cigarettes among smokers and non-smokers in households with children in rural China: A cross-sectional study
Source: PubMed Central journal article supplement (PMC8033598; doi:10.18332/tid/133264), 2021-04-09
Supplement: TID-19-25-s1.pdf [file TID-19-25-s1.pdf]

**Supplementary file: Perceptions about e-cigarettes harmfulness, benefits and addictiveness by smoking status; rural areas of Taizhou and Dali, China 2018 (N=1161).**

|                                                               | Overall<br>n (%) | Smoker<br>n (%) | Nonsmoker<br>n (%) | P-value       |
|---------------------------------------------------------------|------------------|-----------------|--------------------|---------------|
| <b>Heard about e-cigarettes (n=1161)</b>                      |                  |                 |                    | <b>0.0013</b> |
| Yes                                                           | 613(53)          | 375(57)         | 238(47)            |               |
| No                                                            | 548(47)          | 284(43)         | 264(53)            |               |
| <b>e-cigarettes relative harmfulness (n=553)*<sup>a</sup></b> |                  |                 |                    | 0.8981        |
| Less harm                                                     | 324(59)          | 197(59)         | 127(58)            |               |
| Equal or more harm                                            | 229(41)          | 138(41)         | 91(42)             |               |
| <b>e-cigarettes benefits (n=598)*<sup>a</sup></b>             |                  |                 |                    | 0.0958        |
| Helpful to quit smoking                                       | 334(56)          | 194(53)         | 140(60)            |               |
| Otherwise                                                     | 264(44)          | 171(47)         | 93(40)             |               |
| <b>e-cigarettes addictiveness (n=604)*<sup>a</sup></b>        |                  |                 |                    | <b>0.0035</b> |
| Yes                                                           | 80(13)           | 37(10)          | 43(18)             |               |
| Otherwise                                                     | 524(87)          | 332(90)         | 192(82)            |               |

\*Applicable only to those who has heard about e-cigarettes; <sup>a</sup> total number not equal to 613 due to missing cases.
